# Supplementary material for: A cross-species genetic analysis identifies candidate genes for mouse anxiety and human bipolar disorder
Source: Front Behav Neurosci. 2015 Jul 1;9:171. doi: 10.3389/fnbeh.2015.00171 (PMC4486840; doi:10.3389/fnbeh.2015.00171)
Supplement: Supplementary file 7 [file Table5.XLSX]

## Sheet: Sheet1
Supplementary Table 5: Genes commonly coexpressed (coexpression value ≥ 0.5, p-value ≤ 0.05) with RXRG and TNR, in humans, independent of tissue or treatment, as calculated by GeneFriends. This shows the human Entrez gene ID, the gene symbol, the p-value of the coexpression, the human chromosome on which the gene is located, the megabase pair (Mbp) location of the start and end of the gene, and t…
Entrez gene ID	Gene symbol	p-value	Chromosome	Start (Mbp)	End (Mbp)	RXRG	TNR
29974	A1CF	0.0183	10	52.5592	52.6454	0.512	0.64
51146	A4GNT	0.00449	3	137.843	137.851	0.523	0.639
64137	ABCG4	0.00607	11	119.02	119.033	0.501	0.65
23205	ACSBG1	0.00757	15	78.4598	78.538	0.541	0.643
81616	ACSBG2	0.0037	19	6.13526	6.19311	0.526	0.648
23305	ACSL6	0.0111	5	131.143	131.348	0.518	0.648
54988	ACSM5	0.000125	16	20.4209	20.4527	0.53	0.629
89	ACTN3	0.000518	11	66.3139	66.3308	0.541	0.642
8749	ADAM18	7.86e-05	8	39.442	39.5876	0.533	0.655
8748	ADAM20	0.017	14	70.9891	71.0017	0.508	0.647
8745	ADAM23	0.000447	2	207.308	207.486	0.552	0.629
11085	ADAM30	0.000504	1	120.436	120.439	0.526	0.646
80070	ADAMTS20	0.000419	12	43.7477	43.9457	0.504	0.64
11174	ADAMTS6	0.00414	5	64.4446	64.7777	0.507	0.627
107	ADCY1	0.000415	7	45.6137	45.7627	0.528	0.627
55811	ADCY10	0.00927	1	167.779	167.883	0.501	0.649
116	ADCYAP1	0.00255	18	0.904944	0.912173	0.54	0.667
117	ADCYAP1R1	0.00844	7	31.0921	31.1511	0.509	0.633
124	ADH1A	0.00318	4	100.198	100.212	0.526	0.657
130	ADH6	0.0349	4	100.124	100.141	0.515	0.628
131	ADH7	0.0057	4	100.333	100.357	0.529	0.658
9370	ADIPOQ	0.000993	3	186.56	186.576	0.547	0.632
134	ADORA1	0.0171	1	203.06	203.137	0.503	0.633
140	ADORA3	0.00106	1	112.026	112.107	0.541	0.628
150	ADRA2A	0.0431	10	112.837	112.841	0.545	0.643
84830	ADTRP	0.0245	6	11.7123	11.8073	0.522	0.642
173	AFM	0.00258	4	74.3474	74.3697	0.547	0.659
181	AGRP	0.000179	16	67.5165	67.5177	0.539	0.628
186	AGTR2	0.00702	X	115.287	115.291	0.509	0.635
9472	AKAP6	0.0021	14	32.7985	33.3006	0.512	0.632
6718	AKR1D1	0.0037	7	137.687	137.803	0.516	0.634
247	ALOX15B	0.0032	17	7.94233	7.95245	0.537	0.649
59344	ALOXE3	0.0262	17	7.99922	8.02237	0.518	0.648
257	ALX3	0.00168	1	110.603	110.613	0.524	0.63
266	AMELY	0.00401	Y	6.73396	6.74207	0.531	0.657
154796	AMOT	0.0017	X	112.018	112.084	0.52	0.637
270	AMPD1	0.00166	1	115.216	115.238	0.557	0.659
273	AMPH	0.0133	7	38.4233	38.6712	0.529	0.634
287	ANK2	0.00134	4	113.739	114.305	0.548	0.627
390616	ANKRD34C	0.0465	15	79.5751	79.5906	0.547	0.654
314	AOC2	0.00595	17	40.9966	41.0027	0.511	0.635
8120	AP3B2	0.00352	15	83.328	83.3787	0.538	0.661
325	APCS	0.0122	1	159.558	159.559	0.518	0.648
338	APOB	0.000432	2	21.2243	21.2669	0.537	0.648
339	APOBEC1	0.00173	12	7.802	7.8185	0.533	0.667
10930	APOBEC2	0.00137	6	41.021	41.0322	0.51	0.627
347	APOD	0.0343	3	195.296	195.311	0.595	0.627
343	AQP8	0.00442	16	25.2271	25.2403	0.525	0.634
54848	ARHGEF38	0.0286	4	106.474	106.629	0.537	0.65
415	ARSE	0.00191	X	2.8527	2.88629	0.537	0.634
416	ARSF	0.00695	X	2.95951	3.03077	0.534	0.634
417	ART1	0.00216	11	3.66636	3.68565	0.504	0.634
419	ART3	0.026	4	76.9323	77.034	0.603	0.648
420	ART4	0.0387	12	14.9785	14.9964	0.515	0.638
55613	ASB12	0.000981	X	63.4442	63.6153	0.527	0.654
56676	ASCL3	0.0176	11	8.95912	8.96458	0.539	0.637
9311	ASIC3	7.31e-05	7	150.745	150.75	0.525	0.655
434	ASIP	0.0186	20	32.7824	32.8571	0.543	0.639
23120	ATP10B	0.00804	5	159.99	160.279	0.555	0.644
479	ATP12A	0.000518	13	25.2545	25.2859	0.524	0.64
477	ATP1A2	0.008	1	160.086	160.113	0.556	0.632
482	ATP1B2	0.00613	17	7.54995	7.56109	0.547	0.64
23439	ATP1B4	0.00906	X	119.496	119.516	0.533	0.645
487	ATP2A1	6.5e-05	16	28.8897	28.9158	0.527	0.65
495	ATP4A	0.0256	19	36.0409	36.0546	0.54	0.634
496	ATP4B	0.000466	13	114.303	114.313	0.509	0.637
50617	ATP6V0A4	0.0263	7	138.391	138.484	0.537	0.637
534	ATP6V1G2	0.0358	6	31.5122	31.5162	0.518	0.638
26033	ATRNL1	0.00971	10	116.853	117.709	0.545	0.652
92552	ATXN3L	0.00698	X	13.3368	13.3385	0.55	0.671
6795	AURKC	0.00101	19	57.7424	57.7469	0.53	0.657
10317	B3GALT5	0.00743	21	40.9284	41.0451	0.541	0.669
53630	BCMO1	0.00868	16	81.2721	81.3247	0.501	0.635
623	BDKRB1	0.0194	14	96.7222	96.7353	0.503	0.633
146227	BEAN1	0.00695	16	66.4612	66.5274	0.53	0.649
54831	BEST2	0.00158	19	12.8625	12.8693	0.535	0.633
635	BHMT	0.000557	5	78.4076	78.4281	0.528	0.633
27302	BMP10	0.00375	2	69.0926	69.0986	0.532	0.651
9210	BMP15	0.00372	X	50.6538	50.6596	0.51	0.648
651	BMP3	0.0046	4	81.9521	81.9787	0.54	0.654
51297	BPIFA1	0.00261	20	31.8238	31.8311	0.538	0.644
696	BTN1A1	0.0452	6	26.5014	26.5106	0.546	0.663
10917	BTNL3	0.00344	5	180.416	180.434	0.501	0.63
9256	BZRAP1	0.00216	17	56.3786	56.4062	0.525	0.629
79741	C10orf68	0.0219	10	32.7351	32.8635	0.537	0.643
750	C16orf3	0.0103	16	90.0953	90.0963	0.529	0.639
92346	C1orf105	0.00718	1	172.39	172.438	0.544	0.659
375057	C1orf95	0.00662	1	226.737	226.797	0.523	0.628
56245	C21orf62	0.00105	21	34.1659	34.186	0.506	0.637
25775	C22orf24	0.00309	22	32.3295	32.3415	0.506	0.64
10141	C4orf6	0.0161	4	5.5263	5.52953	0.531	0.641
729	C6	0.00232	5	41.1423	41.2615	0.535	0.638
732	C8B	0.0162	1	57.3949	57.4318	0.55	0.642
759	CA1	0.0185	8	86.2398	86.2912	0.516	0.659
23632	CA14	0.0445	1	150.944	150.951	0.579	0.639
762	CA4	0.00441	17	58.2273	58.2483	0.539	0.638
763	CA5A	0.0252	16	87.9216	87.9701	0.549	0.659
766	CA7	0.00086	16	66.8783	66.8881	0.545	0.634
10369	CACNG2	0.0188	22	36.96	37.0996	0.528	0.629
8618	CADPS	0.00134	3	62.384	62.8611	0.536	0.647
793	CALB1	0.00952	8	91.0708	91.1077	0.526	0.643
797	CALCB	0.00196	11	14.9265	15.1039	0.545	0.645
816	CAMK2B	0.000539	7	44.2567	44.3742	0.528	0.628
79012	CAMKV	0.00428	3	49.8954	49.9077	0.53	0.653
10753	CAPN9	0.00889	1	230.883	230.938	0.507	0.634
9607	CARTPT	0.00538	5	71.015	71.0169	0.519	0.64
844	CASQ1	0.00236	1	160.16	160.172	0.54	0.663
887	CCKBR	0.0021	11	6.28097	6.29336	0.525	0.677
6356	CCL11	0.0268	17	32.6127	32.6154	0.536	0.641
6360	CCL16	0.0242	17	34.3035	34.3085	0.545	0.651
1232	CCR3	0.0124	3	46.2051	46.3082	0.536	0.642
1233	CCR4	0.0212	3	32.9931	32.9978	0.527	0.65
1237	CCR8	0.00969	3	39.3712	39.3752	0.529	0.642
10803	CCR9	0.00184	3	45.928	45.9447	0.509	0.643
51622	CCZ1	0.00292	7	5.93836	5.96561	0.503	0.646
11126	CD160	0.0114	1	146.415	146.426	0.517	0.635
57126	CD177	0.00197	19	43.8578	43.8675	0.529	0.631
909	CD1A	0.00198	1	158.224	158.228	0.529	0.659
10666	CD226	0.0119	18	67.4984	67.629	0.502	0.642
922	CD5L	0.0138	1	157.801	157.868	0.535	0.644
941	CD80	0.00992	3	119.243	119.278	0.5	0.64
1006	CDH8	0.042	16	61.6811	62.0709	0.514	0.65
1007	CDH9	0.00949	5	26.8807	27.1213	0.547	0.655
51032	CELA2B	0.00919	1	15.7924	15.8179	0.504	0.644
10136	CELA3A	0.00476	1	22.3281	22.339	0.513	0.632
51286	CEND1	0.0366	11	0.787104	0.790123	0.521	0.629
9350	CER1	0.0045	9	14.7197	14.7227	0.504	0.639
1068	CETN1	0.00779	18	0.580367	0.581524	0.528	0.648
1113	CHGA	0.0153	14	93.3894	93.4016	0.528	0.634
1114	CHGB	0.0472	20	5.89208	5.90601	0.555	0.652
27159	CHIA	0.00707	1	111.833	111.863	0.534	0.642
1129	CHRM2	0.0476	7	136.553	136.705	0.548	0.645
1133	CHRM5	0.0247	15	34.2609	34.3573	0.545	0.657
1134	CHRNA1	0.0019	2	175.612	175.629	0.533	0.657
57053	CHRNA10	1.56e-05	11	3.68682	3.69261	0.506	0.627
55584	CHRNA9	0.0256	4	40.3373	40.3572	0.519	0.633
1142	CHRNB3	0.00145	8	42.5525	42.5926	0.502	0.636
1143	CHRNB4	0.0145	15	78.9165	79.0201	0.522	0.634
1145	CHRNE	0.00115	17	4.80107	4.80637	0.5	0.629
8534	CHST1	0.000652	11	45.6704	45.6872	0.527	0.635
23563	CHST5	0.00697	16	75.5624	75.5691	0.517	0.63
64377	CHST8	0.00237	19	34.1129	34.2644	0.524	0.633
8483	CILP	0.00458	15	65.4883	65.5038	0.544	0.628
1160	CKMT2	0.00106	5	80.5291	80.5622	0.548	0.638
1179	CLCA1	0.0141	1	86.9341	86.966	0.541	0.649
9071	CLDN10	0.00283	13	96.0859	96.232	0.53	0.658
23562	CLDN14	0.0249	21	37.8329	37.9489	0.52	0.634
9073	CLDN8	0.0215	21	31.5863	31.5884	0.536	0.632
9080	CLDN9	0.0175	16	3.06246	3.06451	0.514	0.641
51267	CLEC1A	0.00128	12	10.2222	10.2642	0.525	0.633
27098	CLUL1	0.0179	18	0.596988	0.650334	0.528	0.628
1215	CMA1	0.00594	14	24.9746	24.9775	0.528	0.629
1240	CMKLR1	0.00376	12	108.682	108.733	0.513	0.633
1259	CNGA1	0.0175	4	47.938	48.0187	0.521	0.631
54714	CNGB3	0.00175	8	87.5662	87.7559	0.515	0.651
22866	CNKSR2	0.0122	X	21.3925	21.6728	0.512	0.639
26507	CNNM1	0.00307	10	101.089	101.154	0.504	0.631
1269	CNR2	0.0042	1	24.197	24.2855	0.507	0.629
79935	CNTD2	0.00185	19	40.7281	40.7326	0.537	0.632
1272	CNTN1	0.00891	12	41.0862	41.4662	0.546	0.646
27255	CNTN6	0.0118	3	1.13426	1.4459	0.531	0.644
1302	COL11A2	0.00355	6	33.1305	33.1603	0.518	0.645
10584	COLEC10	0.0188	8	120.008	120.119	0.532	0.648
1358	CPA2	0.00259	7	129.907	129.93	0.51	0.627
1360	CPB1	0.0219	3	148.509	148.578	0.545	0.661
1361	CPB2	0.00238	13	46.6273	46.6792	0.541	0.629
1369	CPN1	0.000406	10	101.802	101.842	0.569	0.649
1370	CPN2	0.0105	3	194.06	194.072	0.539	0.641
23418	CRB1	0.00623	1	197.171	197.448	0.538	0.631
54544	CRCT1	0.0132	1	152.487	152.488	0.524	0.63
1395	CRHR2	0.00685	7	30.6922	30.7397	0.522	0.64
49860	CRNN	0.007	1	152.382	152.387	0.527	0.631
55118	CRTAC1	0.000237	10	99.6248	99.7906	0.534	0.637
1420	CRYGC	0.012	2	208.993	208.995	0.506	0.628
1428	CRYM	0.0194	16	21.2502	21.3144	0.539	0.631
1447	CSN2	0.000442	4	70.821	70.8267	0.524	0.669
1472	CST4	0.00455	20	23.6663	23.6697	0.536	0.631
10047	CST8	0.0236	20	23.4717	23.4767	0.56	0.673
64693	CTAGE1	0.00857	18	19.9936	19.9979	0.505	0.646
1501	CTNND2	0.0382	5	10.972	11.9042	0.514	0.627
440387	CTRB2	0.00394	16	75.238	75.2411	0.531	0.643
11330	CTRC	0.00887	1	15.7649	15.7757	0.517	0.645
1510	CTSE	0.0111	1	206.073	206.087	0.516	0.63
8029	CUBN	0.00412	10	16.866	17.1718	0.54	0.639
3627	CXCL10	0.0126	4	76.9423	76.9446	0.54	0.636
4283	CXCL9	0.0163	4	76.9224	76.9286	0.543	0.646
1538	CYLC1	0.0027	X	83.1162	83.1417	0.5	0.639
1539	CYLC2	0.000204	9	105.758	105.781	0.524	0.665
1583	CYP11A1	0.00637	15	74.6301	74.6601	0.547	0.641
1584	CYP11B1	0.00868	8	143.954	143.961	0.516	0.655
1586	CYP17A1	0.000457	10	104.59	104.597	0.525	0.663
1543	CYP1A1	0.0152	15	75.0119	75.018	0.543	0.628
1592	CYP26A1	0.0122	10	94.8332	94.8376	0.526	0.629
1549	CYP2A7	0.00396	19	41.3813	41.3887	0.537	0.653
1555	CYP2B6	0.0187	19	41.4972	41.5243	0.505	0.629
1562	CYP2C18	0.00176	10	96.4433	96.4959	0.523	0.627
1557	CYP2C19	0.00261	10	96.4479	96.613	0.533	0.655
1559	CYP2C9	0.00795	10	96.6984	96.7491	0.506	0.64
1579	CYP4A22	0.00065	1	47.6031	47.6154	0.524	0.65
284541	CYP4A22	0.0203	1	47.6031	47.6154	0.511	0.63
4051	CYP4F3	0.0133	19	15.7517	15.7736	0.526	0.629
9420	CYP7B1	9.85e-05	8	65.5003	65.7113	0.535	0.644
57105	CYSLTR2	0.0277	13	49.281	49.2835	0.521	0.63
1610	DAO	0.00376	12	109.253	109.295	0.504	0.631
1630	DCC	0.00639	18	49.8665	51.0578	0.522	0.656
1638	DCT	5.21e-05	13	95.0896	95.1319	0.57	0.628
1641	DCX	0.00167	X	110.537	110.656	0.53	0.633
50514	DEC1	0.0206	9	117.904	118.165	0.532	0.662
1669	DEFA4	0.00383	8	6.79334	6.79586	0.537	0.654
1670	DEFA5	0.00811	8	6.91283	6.91426	0.544	0.668
81623	DEFB126	0.00165	20	0.12301	0.126392	0.522	0.63
9162	DGKI	0.00574	7	137.066	137.532	0.554	0.637
1733	DIO1	0.00157	1	54.3569	54.3768	0.528	0.642
27185	DISC1	0.00084	1	231.763	232.177	0.503	0.627
9228	DLGAP2	0.022	8	1.44953	1.65664	0.516	0.646
8788	DLK1	0.0411	14	101.192	101.202	0.552	0.635
1776	DNASE1L3	0.0147	3	58.178	58.2004	0.521	0.636
26052	DNM3	0.0357	1	171.811	172.388	0.512	0.628
8448	DOC2A	0.0188	16	30.0168	30.0346	0.539	0.638
1800	DPEP1	0.0153	16	89.6797	89.7048	0.545	0.649
1804	DPP6	0.00233	7	153.584	154.686	0.537	0.637
1830	DSG3	0.00544	18	29.0278	29.0587	0.53	0.641
51207	DUSP13	0.00337	10	76.8542	76.869	0.521	0.648
80258	EFHC2	8.29e-05	X	44.0071	44.2029	0.524	0.647
22979	EFR3B	0.00525	2	25.265	25.3782	0.507	0.634
25975	EGFL6	0.00119	X	13.5877	13.6517	0.529	0.635
1996	ELAVL4	0.00169	1	50.5137	50.6695	0.527	0.65
2015	EMR1	0.00587	19	6.88758	6.94047	0.526	0.638
956	ENTPD3	0.0085	3	40.4286	40.4701	0.538	0.631
2044	EPHA5	0.0011	4	66.1853	66.5362	0.532	0.646
79574	EPS8L3	0.0101	1	110.293	110.307	0.533	0.643
1833	EPYC	0.0114	12	91.3575	91.3988	0.523	0.638
2066	ERBB4	0.00122	2	212.24	213.404	0.525	0.653
64850	ETNPPL	0.0149	4	109.663	109.684	0.543	0.636
2158	F9	0.00508	X	138.613	138.646	0.527	0.645
2173	FABP7	0.0117	6	123.101	123.105	0.566	0.632
285596	FAM153B	0.0331	5	175.488	175.559	0.519	0.645
79632	FAM184A	0.019	6	119.281	119.471	0.514	0.631
356	FASLG	0.00531	1	172.628	172.636	0.508	0.644
2220	FCN2	0.0196	9	137.773	137.78	0.506	0.665
2244	FGB	0.00545	4	155.484	155.492	0.505	0.63
2249	FGF4	0.00292	11	69.5878	69.5902	0.528	0.646
2266	FGG	0.016	4	155.525	155.534	0.532	0.639
2277	FIGF	0.016	X	15.3637	15.4025	0.565	0.633
8468	FKBP6	0.00569	7	72.7931	72.8236	0.502	0.634
23769	FLRT1	0.00654	11	63.8707	63.8866	0.541	0.66
2322	FLT3	0.0023	13	28.5774	28.6747	0.532	0.65
2327	FMO2	0.000253	1	171.154	171.182	0.551	0.633
2306	FOXD2	8.46e-05	1	47.9017	47.9064	0.529	0.628
2294	FOXF1	0.0377	16	86.5441	86.5481	0.524	0.636
8928	FOXH1	0.0232	8	145.699	145.702	0.509	0.642
2299	FOXI1	0.00199	5	169.533	169.537	0.532	0.642
80144	FRAS1	0.00739	4	78.9787	79.4654	0.511	0.639
22844	FRMPD1	0.00271	9	37.651	37.7469	0.542	0.649
29999	FSCN3	0.00296	7	127.231	127.242	0.53	0.643
53822	FXYD7	0.0112	19	35.6342	35.6452	0.536	0.642
2555	GABRA2	0.00358	4	46.2504	46.4772	0.539	0.643
2557	GABRA4	0.000108	4	46.9209	46.9964	0.524	0.644
2558	GABRA5	0.0283	15	27.1115	27.1944	0.515	0.642
2560	GABRB1	0.029	4	46.9957	47.4285	0.557	0.659
2561	GABRB2	0.00502	5	160.715	160.976	0.55	0.646
2566	GABRG2	0.0174	5	161.495	161.583	0.559	0.662
2567	GABRG3	0.00141	15	27.2164	27.7784	0.506	0.638
55879	GABRQ	4.01e-05	X	151.807	151.822	0.525	0.643
2569	GABRR1	0.00152	6	89.8872	89.941	0.52	0.65
2570	GABRR2	0.00835	6	89.9669	90.025	0.51	0.635
2572	GAD2	0.00881	10	26.5052	26.5935	0.506	0.628
26290	GALNT8	0.00184	12	4.82951	4.96028	0.515	0.63
2596	GAP43	0.00425	3	115.342	115.44	0.529	0.63
26330	GAPDHS	0.00422	19	36.0243	36.0362	0.554	0.637
2520	GAST	0.00158	17	39.8686	39.8722	0.51	0.638
57733	GBA3	0.00909	4	22.6945	22.8212	0.516	0.628
2638	GC	0.038	4	72.6074	72.6698	0.541	0.633
9247	GCM2	0.0164	6	10.8735	10.8822	0.536	0.644
51301	GCNT4	0.0434	5	74.3233	74.3267	0.514	0.651
2662	GDF10	0.028	10	47.7958	47.809	0.573	0.667
2661	GDF9	0.00103	5	132.197	132.203	0.501	0.627
2707	GJB3	0.0302	1	35.2468	35.252	0.503	0.627
57369	GJD2	0.00678	15	35.0432	35.0472	0.508	0.628
2712	GK2	0.0397	4	80.3275	80.3294	0.517	0.653
2741	GLRA1	0.000562	5	151.202	151.304	0.528	0.66
2742	GLRA2	0.0239	X	14.5474	14.7499	0.543	0.631
2765	GML	0.00952	8	143.916	143.998	0.549	0.665
2775	GNAO1	0.0196	16	56.2253	56.3914	0.522	0.629
346562	GNAT3	0.00827	7	80.088	80.1413	0.559	0.677
2785	GNG3	0.0258	11	62.4751	62.4767	0.506	0.633
2797	GNRH2	0.00146	20	3.02427	3.02639	0.539	0.641
2798	GNRHR	0.00216	4	68.605	68.6201	0.503	0.63
2813	GP2	0.00826	16	20.3209	20.3391	0.51	0.634
2814	GP5	0.0099	3	194.116	194.12	0.516	0.631
2835	GPR12	0.000445	13	27.3293	27.3349	0.531	0.66
2838	GPR15	0.00436	3	98.2507	98.252	0.535	0.634
11318	GPR182	0.00184	12	57.3882	57.3905	0.503	0.628
2854	GPR32	0.000546	19	51.2737	51.275	0.534	0.64
2859	GPR35	0.0251	2	241.545	241.571	0.508	0.632
10936	GPR75	0.0358	2	54.08	54.0871	0.516	0.637
54112	GPR88	0.00333	1	101.004	101.008	0.541	0.639
84059	GPR98	0.00467	5	89.8252	90.46	0.519	0.641
2880	GPX5	0.0126	6	28.4938	28.5027	0.506	0.635
2893	GRIA4	0.000846	11	105.481	105.853	0.537	0.646
2895	GRID2	0.0241	4	93.2255	94.6957	0.552	0.655
2897	GRIK1	0.0493	21	30.9093	31.3124	0.516	0.646
2903	GRIN2A	0.00196	16	9.85238	10.2766	0.545	0.645
2904	GRIN2B	0.00469	12	13.6932	14.1331	0.509	0.635
2913	GRM3	0.0213	7	86.2732	86.4942	0.537	0.644
2916	GRM6	0.0128	5	178.405	178.423	0.506	0.633
2925	GRPR	0.00299	X	16.1417	16.1711	0.543	0.647
83445	GSG1	0.0331	12	13.2365	13.2566	0.508	0.632
2938	GSTA1	0.0314	6	52.6565	52.6687	0.516	0.648
2984	GUCY2C	0.0143	12	14.7656	14.8495	0.522	0.633
3000	GUCY2D	0.000165	17	7.90591	7.92366	0.548	0.634
3034	HAL	0.000537	12	96.3664	96.3901	0.523	0.634
54363	HAO1	0.0112	20	7.86363	7.92112	0.555	0.644
51179	HAO2	0.0034	1	119.911	119.937	0.541	0.659
26762	HAVCR1	0.00136	5	156.456	156.486	0.532	0.647
3060	HCRT	0.00361	17	40.3361	40.3375	0.508	0.655
3062	HCRTR2	0.017	6	55.0391	55.1474	0.55	0.659
3067	HDC	0.00428	15	50.5341	50.5582	0.525	0.635
23072	HECW1	0.0054	7	43.1522	43.6056	0.503	0.634
9843	HEPH	0.0164	X	65.3824	65.4887	0.511	0.633
79802	HHIPL2	0.0259	1	222.696	222.721	0.51	0.634
8356	HIST1H3F	0.00489	6	26.2711	26.2716	0.525	0.631
57824	HMHB1	0.0115	5	143.192	143.2	0.511	0.656
3203	HOXA6	0.00284	7	27.185	27.1902	0.506	0.647
3211	HOXB1	0.00697	17	46.6059	46.6084	0.552	0.643
3273	HRG	0.00133	3	186.378	186.396	0.524	0.656
59340	HRH4	0.0128	18	22.0406	22.0599	0.517	0.656
9956	HS3ST2	0.008	16	22.8255	22.9277	0.518	0.628
3293	HSD17B3	0.0126	9	98.9976	99.0644	0.549	0.639
126393	HSPB6	0.0109	19	36.2455	36.249	0.545	0.642
3346	HTN1	0.00309	4	70.9161	70.9246	0.538	0.638
3355	HTR1F	0.032	3	88.0398	88.0429	0.523	0.655
3356	HTR2A	0.012	13	47.4057	47.4712	0.518	0.644
3358	HTR2C	0.00534	X	113.821	114.147	0.531	0.642
9177	HTR3B	0.0234	11	113.775	113.817	0.539	0.641
3362	HTR6	0.0398	1	19.9918	20.0061	0.518	0.665
30811	HUNK	0.00419	21	33.2456	33.4169	0.511	0.648
7087	ICAM5	0.0079	19	10.4007	10.4075	0.526	0.634
3446	IFNA10	0.0012	9	21.2062	21.2071	0.537	0.65
3448	IFNA14	0.00634	9	21.2392	21.24	0.539	0.675
3449	IFNA16	0.00011	9	21.2164	21.2173	0.526	0.657
3451	IFNA17	0.0348	9	21.2272	21.2282	0.515	0.637
3441	IFNA4	0.0257	9	21.1866	21.1876	0.555	0.68
3442	IFNA5	0.000287	9	21.3046	21.3053	0.537	0.67
3443	IFNA6	0.00855	9	21.3498	21.3514	0.529	0.632
3444	IFNA7	0.00367	9	21.2015	21.2022	0.542	0.668
3458	IFNG	0.00707	12	68.5485	68.5535	0.519	0.645
3483	IGFALS	0.0138	16	1.84041	1.84497	0.503	0.641
3593	IL12B	0.000682	5	158.742	158.758	0.503	0.629
3596	IL13	0.00714	5	131.992	131.997	0.513	0.634
29949	IL19	0.00553	1	206.972	207.016	0.532	0.632
11141	IL1RAPL1	0.0031	X	28.6055	29.9748	0.547	0.652
26280	IL1RAPL2	0.000618	X	103.811	105.012	0.528	0.635
59067	IL21	0.0085	4	123.534	123.542	0.545	0.656
58985	IL22RA1	0.012	1	24.4463	24.4696	0.507	0.628
27179	IL36A	0.0303	2	113.763	113.766	0.522	0.656
56300	IL36G	0.0164	2	113.731	113.743	0.52	0.632
9118	INA	0.0329	10	105.037	105.05	0.533	0.629
3623	INHA	9e-05	2	220.434	220.44	0.531	0.63
3641	INSL4	0.0149	9	5.23142	5.2353	0.52	0.629
10022	INSL5	0.00389	1	67.2634	67.2669	0.535	0.651
79781	IQCA1	0.00554	2	237.233	237.416	0.511	0.639
56269	IRGC	0.0023	19	44.2202	44.2242	0.528	0.636
8516	ITGA8	0.00159	10	15.5559	15.7621	0.517	0.632
3698	ITIH2	0.00262	10	7.74523	7.79148	0.545	0.653
3713	IVL	0.0209	1	152.881	152.884	0.544	0.655
3736	KCNA1	0.00102	12	5.01907	5.04053	0.528	0.65
3742	KCNA6	0.0173	12	4.91834	4.96028	0.517	0.638
9196	KCNAB3	0.000116	17	7.82518	7.83312	0.526	0.63
3745	KCNB1	0.00199	20	47.9804	48.0992	0.531	0.652
3746	KCNC1	0.013	11	17.7564	17.8046	0.544	0.649
3748	KCNC3	7.84e-05	19	50.8152	50.8368	0.508	0.633
3753	KCNE1	0.0159	21	35.819	35.8846	0.52	0.641
23415	KCNH4	3.61e-05	17	40.3089	40.3333	0.535	0.642
30820	KCNIP1	0.000188	5	169.78	170.164	0.527	0.646
30819	KCNIP2	0.00017	10	103.586	103.604	0.507	0.628
3766	KCNJ10	0.00267	1	160.007	160.04	0.533	0.639
3773	KCNJ16	0.00248	17	68.0496	68.1317	0.526	0.636
3760	KCNJ3	0.0453	2	155.555	155.715	0.518	0.644
3765	KCNJ9	0.00139	1	160.051	160.06	0.546	0.637
54207	KCNK10	0.0082	14	88.6491	88.7933	0.512	0.653
10242	KCNMB2	0.00632	3	177.991	178.562	0.521	0.635
3787	KCNS1	0.00704	20	43.721	43.7298	0.548	0.66
169522	KCNV2	0.0151	9	2.7175	2.73004	0.515	0.636
11081	KERA	0.0111	12	91.4443	91.4518	0.533	0.642
202559	KHDRBS2	0.00598	6	62.3899	62.9961	0.532	0.639
23349	KIAA1045	0.000578	9	34.9575	34.9825	0.524	0.636
25758	KIAA1549L	0.000845	11	33.5636	33.6956	0.528	0.642
85452	KIAA1751	0.0191	1	1.8534	1.93528	0.514	0.647
547	KIF1A	0.00194	2	241.653	241.76	0.525	0.647
3798	KIF5A	0.0125	12	57.9438	57.9804	0.523	0.642
3811	KIR3DL2	0.00125	19	55.2277	55.3702	0.527	0.632
55220	KLHDC8A	0.000278	1	205.305	205.326	0.542	0.631
57626	KLHL1	0.00363	13	70.2747	70.6826	0.532	0.645
25818	KLK5	0.0069	19	51.4466	51.4563	0.525	0.627
11202	KLK8	0.0251	19	51.4993	51.506	0.531	0.654
3848	KRT1	0.0279	12	53.0685	53.0742	0.55	0.66
3849	KRT2	0.00485	12	53.0383	53.0459	0.534	0.661
192666	KRT24	0.0213	17	38.8542	38.86	0.506	0.637
3881	KRT31	0.0157	17	39.5573	39.5611	0.514	0.646
3882	KRT32	0.00173	17	39.6161	39.6237	0.536	0.64
3886	KRT35	0.0102	17	39.6329	39.6374	0.531	0.637
8688	KRT37	0.00877	17	39.577	39.5808	0.517	0.655
8687	KRT38	0.00202	17	39.5927	39.5972	0.521	0.636
3891	KRT85	0.00247	12	52.7538	52.7613	0.531	0.628
81851	KRTAP1-1	0.0022	17	39.1968	39.1977	0.535	0.651
54596	L1TD1	0.0199	1	62.6605	62.678	0.518	0.653
3904	LAIR2	0.0227	19	55.0091	55.0219	0.523	0.637
22798	LAMB4	0.000513	7	107.664	107.771	0.509	0.631
3933	LCN1	0.000564	9	138.413	138.418	0.537	0.649
92483	LDHAL6B	0.00128	15	59.499	59.5007	0.541	0.653
11061	LECT1	0.00634	13	53.2774	53.3139	0.542	0.67
7044	LEFTY1	0.000878	1	226.124	226.129	0.529	0.633
10637	LEFTY1	0.00332	1	226.124	226.129	0.524	0.657
29124	LGALS13	0.00509	19	40.0932	40.0981	0.526	0.642
56891	LGALS14	0.0105	19	40.1949	40.2001	0.507	0.64
3960	LGALS4	0.00123	19	39.2923	39.304	0.537	0.63
3972	LHB	0.000813	19	49.5192	49.5203	0.529	0.643
3982	LIM2	3.24e-05	19	51.8832	51.8912	0.533	0.633
8513	LIPF	0.0194	10	90.4242	90.4386	0.525	0.647
4004	LMO1	0.000156	11	8.24585	8.29026	0.53	0.637
55885	LMO3	0.00339	12	16.7013	16.7635	0.545	0.63
2917	LOC100996542	0.0206	3	6.81169	7.78322	0.51	0.655
3806	LOC100996743	0.00149	19	54.9794	55.0078	0.532	0.634
3804	LOC100996743	0.011	19	54.9794	55.0078	0.533	0.644
4974	LOC101927057	0.036	17	29.599	29.6246	0.523	0.643
9227	LOC101927965	0.0198	4	155.548	155.674	0.533	0.636
23566	LPAR3	0.0211	1	85.2773	85.3589	0.54	0.634
54886	LPPR1	0.002	9	103.791	104.087	0.53	0.646
9890	LPPR4	0.0115	1	99.7295	99.7751	0.545	0.64
4036	LRP2	0.00818	2	169.984	170.219	0.516	0.631
54674	LRRN3	0.0315	7	110.731	110.766	0.547	0.628
57408	LRTM1	6.82e-05	3	54.9523	55.0011	0.525	0.64
338645	LUZP2	0.0381	11	24.5185	25.1042	0.531	0.642
51213	LUZP4	0.0217	X	114.524	114.542	0.548	0.634
80740	LY6G6C	0.00565	6	31.6764	31.6796	0.513	0.648
58530	LY6G6D	0.0288	6	31.6731	31.6755	0.514	0.631
4062	LY6H	0.0203	8	144.239	144.242	0.516	0.634
4081	MAB21L1	0.00786	13	36.0479	36.0508	0.534	0.631
10586	MAB21L2	0.00616	4	151.503	151.506	0.53	0.654
8174	MADCAM1	0.00401	19	0.489176	0.505347	0.506	0.636
4107	MAGEA8	0.00488	X	148.963	148.968	0.534	0.648
4113	MAGEB2	0.0211	X	30.2337	30.2382	0.52	0.629
9947	MAGEC1	0.00207	X	140.992	140.997	0.55	0.631
139081	MAGEC3	0.00548	X	140.926	140.986	0.528	0.641
4118	MAL	0.0206	2	95.6914	95.7197	0.559	0.642
4133	MAP2	0.0138	2	210.289	210.599	0.538	0.631
5602	MAPK10	0.00278	4	86.9363	87.5153	0.546	0.64
4142	MAS1	0.00735	6	160.328	160.329	0.542	0.639
4151	MB	0.00592	22	36.0028	36.034	0.536	0.628
4158	MC2R	0.00349	18	13.882	13.9157	0.504	0.627
4159	MC3R	0.00304	20	54.8238	54.8249	0.535	0.629
4161	MC5R	0.0023	18	13.8242	13.8269	0.532	0.631
4168	MCF2	0.00664	X	138.664	138.79	0.503	0.633
4210	MEFV	0.0192	16	3.29203	3.30663	0.524	0.651
4225	MEP1B	0.0305	18	29.765	29.8004	0.535	0.644
117153	MIA2	0.00443	14	39.6994	39.7229	0.518	0.643
4284	MIP	0.00831	12	56.8433	56.8629	0.514	0.639
2315	MLANA	0.000648	9	5.8908	5.91061	0.571	0.643
51085	MLXIPL	0.0208	7	73.0582	73.0895	0.535	0.627
4321	MMP12	0.00935	11	102.733	102.746	0.512	0.629
4325	MMP16	0.000144	8	89.0442	89.3403	0.513	0.631
56547	MMP26	0.00114	11	4.72616	5.01366	0.532	0.639
64066	MMP27	0.00471	11	102.562	102.577	0.513	0.64
4317	MMP8	0.00159	11	102.583	102.598	0.556	0.643
4336	MOBP	0.0072	3	39.5087	39.571	0.516	0.656
4340	MOG	0.0203	6	29.6214	29.6367	0.507	0.641
80168	MOGAT2	0.0222	11	75.4289	75.444	0.516	0.635
4342	MOS	4.15e-05	8	57.0255	57.0265	0.525	0.637
4356	MPP3	0.0131	17	41.8782	41.9105	0.507	0.632
758	MPPED1	0.0191	22	43.8072	43.9037	0.518	0.639
4359	MPZ	0.00388	1	161.275	161.28	0.552	0.634
54860	MS4A12	0.00378	11	60.2603	60.2749	0.53	0.635
2206	MS4A2	0.00402	11	59.8557	59.8634	0.533	0.668
4438	MSH4	0.00227	1	76.2626	76.3789	0.541	0.661
4504	MT3	0.0075	16	56.623	56.625	0.527	0.64
4547	MTTP	0.0188	4	100.485	100.545	0.534	0.631
4583	MUC2	0.0113	11	1.07488	1.10442	0.541	0.628
4593	MUSK	0.000204	9	113.431	113.564	0.509	0.631
4604	MYBPC1	0.029	12	101.962	102.08	0.569	0.659
8735	MYH13	0.00525	17	10.2014	10.2764	0.546	0.642
22989	MYH15	0.00599	3	108.099	108.248	0.51	0.647
4620	MYH2	0.00103	17	10.4245	10.4533	0.542	0.654
4625	MYH7	0.00108	14	23.8819	23.9049	0.54	0.633
4626	MYH8	0.0484	17	10.2936	10.3253	0.519	0.641
4632	MYL1	0.0278	2	211.155	211.18	0.545	0.639
93408	MYL10	0.0015	7	101.257	101.273	0.508	0.637
4633	MYL2	0.00853	12	111.349	111.359	0.545	0.636
4640	MYO1A	0.0125	12	57.4223	57.445	0.516	0.638
58529	MYOZ1	4.9e-05	10	75.3914	75.4015	0.541	0.629
84779	NAA11	0.00607	4	80.1468	80.2472	0.541	0.649
4685	NCAM2	0.00134	21	22.3706	22.9156	0.544	0.659
1463	NCAN	0.00917	19	19.3228	19.363	0.54	0.66
4693	NDP	0.0124	X	43.808	43.8327	0.541	0.656
9348	NDST3	0.00229	4	118.955	119.18	0.541	0.651
64579	NDST4	0.00218	4	115.749	116.035	0.545	0.652
4761	NEUROD2	0.000808	17	37.7598	37.766	0.528	0.654
58158	NEUROD4	0.00108	12	55.4137	55.4238	0.532	0.653
63974	NEUROD6	0.00861	7	31.3771	31.3805	0.543	0.652
4829	NMBR	0.0391	6	142.379	142.41	0.549	0.66
8382	NME5	0.0438	5	137.451	137.475	0.551	0.634
4826	NNAT	0.0141	20	36.1496	36.1521	0.545	0.634
4838	NODAL	0.00354	10	72.1921	72.2077	0.513	0.631
4842	NOS1	0.00447	12	117.646	117.89	0.522	0.65
4843	NOS2	0.00021	17	26.0838	26.1275	0.532	0.64
23742	NPAP1	0.0293	15	24.9205	24.9286	0.518	0.633
64067	NPAS3	0.00226	14	33.4041	34.2734	0.504	0.628
4878	NPPA	0.00408	1	11.9058	11.9084	0.505	0.65
4879	NPPB	0.000941	1	11.9175	11.919	0.527	0.635
4852	NPY	0.0093	7	24.3238	24.3315	0.548	0.648
4887	NPY2R	0.00877	4	156.13	156.138	0.518	0.641
4889	NPY5R	0.000525	4	164.265	164.273	0.54	0.664
190	NR0B1	0.032	X	30.3223	30.3277	0.527	0.625
8431	NR0B2	0.0129	1	27.238	27.2405	0.531	0.632
9971	NR1H4	0.00581	12	100.867	100.958	0.52	0.63
9378	NRXN1	0.00877	2	50.1456	51.2597	0.507	0.628
79730	NSUN7	0.00972	4	40.7519	40.812	0.519	0.632
9423	NTN1	0.000766	17	8.92486	9.14732	0.507	0.634
22854	NTNG1	0.000188	1	107.683	108.026	0.546	0.64
4915	NTRK2	0.00183	9	87.2835	87.6385	0.535	0.638
4916	NTRK3	0.00848	15	88.4182	88.8	0.522	0.646
60506	NYX	0.00123	X	41.3067	41.335	0.508	0.636
10896	OCLM	0.0161	1	186.37	186.371	0.51	0.65
54959	ODAM	0.0123	4	71.0622	71.0703	0.533	0.641
4956	ODF1	0.0177	8	103.564	103.573	0.516	0.648
10215	OLIG2	0.00263	21	34.3982	34.4015	0.541	0.628
9480	ONECUT2	0.00494	18	55.1029	55.1585	0.508	0.634
4978	OPCML	0.0224	11	132.285	133.402	0.541	0.664
4986	OPRK1	0.00203	8	54.1383	54.1643	0.548	0.641
442194	OR10C1	0.0034	6	29.3816	29.4053	0.538	0.65
26539	OR10H1	0.0276	19	15.9178	15.9189	0.518	0.632
26532	OR10H3	0.00563	19	15.8522	15.8532	0.541	0.665
4991	OR1D2	0.00714	17	2.99535	2.99629	0.51	0.633
4992	OR1F1	0.0273	16	3.25425	3.25519	0.518	0.649
81697	OR2B2	0.0164	6	27.879	27.8802	0.523	0.673
26212	OR2B6	0.0244	6	27.925	27.926	0.504	0.644
4993	OR2C1	0.00361	16	3.40589	3.40692	0.515	0.632
135948	OR2F2	0.00129	7	143.632	143.633	0.534	0.646
7932	OR2H2	0.0103	6	29.5523	29.5533	0.506	0.656
56656	OR2S2	0.00112	9	35.9571	35.9582	0.525	0.638
26692	OR2W1	0.00112	6	29.0086	29.0096	0.525	0.655
4995	OR3A2	0.000497	17	3.18119	3.18227	0.504	0.628
23538	OR52A1	0.00687	11	5.17224	5.20761	0.534	0.659
10798	OR5I1	0.03	11	55.7029	55.7039	0.544	0.657
26333	OR7A17	0.00214	19	14.9911	14.9923	0.534	0.651
26664	OR7C1	0.0004	19	14.91	14.911	0.529	0.647
26648	OR7E24	0.00111	19	9.36161	9.36282	0.528	0.657
56914	OTOR	0.014	20	16.729	16.7507	0.522	0.646
5030	P2RY4	0.00211	X	69.478	69.4797	0.506	0.637
5071	PARK2	0.000528	6	161.768	163.149	0.504	0.644
5075	PAX1	0.000303	20	21.6863	21.6966	0.528	0.642
5076	PAX2	0.0392	10	102.495	102.59	0.5	0.631
5077	PAX3	0.0314	2	223.065	223.164	0.528	0.618
27253	PCDH17	0.0078	13	58.2059	58.3034	0.527	0.63
29930	PCDHB1	0.00617	5	140.431	140.434	0.514	0.638
56114	PCDHGA1	0.00336	5	140.71	140.893	0.501	0.63
9468	PCYT1B	0.00286	X	24.5762	24.6908	0.508	0.631
5133	PDCD1	0.000901	2	242.792	242.801	0.534	0.637
50940	PDE11A	7.53e-05	2	178.488	178.973	0.502	0.631
5137	PDE1C	0.000513	7	31.7908	32.3389	0.527	0.642
5145	PDE6A	0.000508	5	149.238	149.324	0.535	0.634
5161	PDHA2	0.00391	4	96.7612	96.7626	0.508	0.635
79955	PDZD7	0.0118	10	102.767	102.791	0.539	0.643
29951	PDZRN4	0.00141	12	41.5823	41.9684	0.536	0.633
5178	PEG3	0.0139	19	57.3214	57.3521	0.54	0.634
5179	PENK	0.00821	8	57.3492	57.3593	0.535	0.635
57115	PGLYRP4	0.0127	1	153.303	153.321	0.515	0.634
5260	PHKG1	7.97e-05	7	56.1484	56.1607	0.536	0.634
8929	PHOX2B	0.00791	4	41.7461	41.751	0.549	0.666
9796	PHYHIP	0.0254	8	22.0772	22.0899	0.558	0.634
51050	PI15	4.7e-05	8	75.7368	75.7673	0.545	0.627
5284	PIGR	0.0359	1	207.102	207.12	0.519	0.632
5288	PIK3C2G	0.0488	12	18.4005	18.8013	0.543	0.666
8395	PIP5K1B	0.0137	9	71.3206	71.6241	0.507	0.633
64600	PLA2G2F	0.00122	1	20.4658	20.4769	0.527	0.652
10761	PLAC1	0.0183	X	133.7	133.898	0.526	0.632
57047	PLSCR2	0.013	3	146.109	146.214	0.538	0.656
5375	PMP2	0.0108	8	82.3526	82.3598	0.572	0.66
5406	PNLIP	0.0302	10	118.305	118.327	0.535	0.653
5368	PNOC	0.0134	8	28.1745	28.2009	0.536	0.632
94026	POM121L2	0.0293	6	27.2537	27.2799	0.505	0.639
5444	PON1	0.0268	7	94.927	95.0257	0.512	0.638
5457	POU4F1	0.00168	13	79.1725	79.1777	0.512	0.627
5458	POU4F2	0.00136	4	147.56	147.564	0.528	0.673
5475	PPEF1	0.0157	X	18.694	18.846	0.54	0.631
54866	PPP1R14D	0.00342	15	41.1076	41.1209	0.505	0.641
10842	PPP1R17	0.036	7	31.7263	31.7481	0.521	0.648
5521	PPP2R2B	0.0281	5	145.968	146.464	0.518	0.643
5539	PPY	0.000758	17	42.0182	42.0198	0.531	0.664
390999	PRAMEF12	0.0247	1	12.835	12.838	0.528	0.636
11107	PRDM5	0.0111	4	121.606	121.844	0.519	0.646
10394	PRG3	0.0153	11	57.1442	57.1486	0.543	0.657
5568	PRKACG	0.0189	9	71.6275	71.629	0.524	0.651
5588	PRKCQ	0.00152	10	6.4691	6.62226	0.524	0.629
5593	PRKG2	0.00541	4	82.0098	82.1362	0.533	0.656
5617	PRL	0.00538	6	22.2875	22.2977	0.547	0.665
56341	PRMT8	0.0107	12	3.49051	3.70314	0.521	0.627
58510	PRODH2	0.00317	19	36.2909	36.3042	0.506	0.633
58503	PROL1	0.0283	4	71.2636	71.2759	0.517	0.658
8858	PROZ	0.000944	13	113.813	113.827	0.529	0.632
221823	PRPS1L1	0.0278	7	18.0664	18.0675	0.518	0.634
79057	PRRG3	0.0237	X	150.864	150.874	0.526	0.634
8492	PRSS12	0.0266	4	119.201	119.274	0.527	0.649
29122	PRSS50	0.0103	3	46.7536	46.8541	0.529	0.636
158471	PRUNE2	0.00516	9	79.2263	79.521	0.53	0.63
5671	PSG11	0.00375	19	43.2258	43.2447	0.511	0.63
5670	PSG2	0.0401	19	43.5684	43.5872	0.54	0.665
5672	PSG4	0.0118	19	43.6969	43.7115	0.505	0.636
5673	PSG5	0.0432	19	43.6704	43.6907	0.538	0.634
5675	PSG6	0.00381	19	43.4062	43.4237	0.503	0.633
5678	PSG9	0.00428	19	43.7159	43.7737	0.503	0.639
5745	PTH1R	0.00635	3	46.9192	46.9453	0.513	0.648
5801	PTPRR	0.00393	12	71.0319	71.3146	0.525	0.627
5803	PTPRZ1	0.0415	7	121.513	121.702	0.583	0.63
149628	PYHIN1	0.0409	1	158.901	158.947	0.522	0.645
5858	PZP	0.00457	12	9.30144	9.36097	0.537	0.648
10633	RASL10A	0.0225	22	29.7089	29.7157	0.559	0.643
54715	RBFOX1	0.000765	16	6.06909	7.76334	0.54	0.645
27288	RBMXL2	0.0186	11	7.11017	7.11238	0.521	0.628
378950	RBMY1J	0.0132	Y	24.455	24.564	0.527	0.64
5968	REG1B	0.0117	2	79.3122	79.3151	0.552	0.671
5068	REG3A	0.00247	2	79.3841	79.3869	0.537	0.663
5649	RELN	0.0104	7	103.112	103.63	0.533	0.635
5979	RET	0.0137	10	43.5725	43.6258	0.548	0.646
10739	RFPL2	0.000672	22	32.5864	32.6007	0.535	0.635
6000	RGS7	0.0492	1	240.932	241.521	0.523	0.636
353299	RGSL1	0.0271	1	182.419	182.53	0.545	0.653
6005	RHAG	0.00246	6	49.5729	49.6046	0.501	0.633
79608	RIC3	0.000348	11	8.1276	8.1906	0.535	0.631
9699	RIMS2	0.017	8	104.513	105.268	0.514	0.638
6017	RLBP1	0.00699	15	89.7531	89.765	0.578	0.654
56163	RNF17	0.00329	13	25.3383	25.4541	0.503	0.646
54546	RNF186	0.0149	1	20.1405	20.1418	0.537	0.651
80352	RNF39	0.0435	6	30.0279	30.0336	0.534	0.643
6098	ROS1	0.00742	6	117.609	117.747	0.519	0.658
57096	RPGRIP1	0.00594	14	21.7561	21.8195	0.517	0.649
22895	RPH3A	0.000575	12	113.008	113.337	0.528	0.644
56475	RPRM	0.00934	2	154.334	154.335	0.525	0.627
10692	RRH	0.00379	4	110.749	110.766	0.534	0.655
6247	RS1	0.0326	X	18.658	18.6902	0.511	0.643
10900	RUNDC3A	0.00212	17	42.3858	42.396	0.525	0.628
6258	RXRG	0.00121	1	165.37	165.414	1	0.638
6263	RYR3	0.00263	15	33.6032	34.1583	0.549	0.65
6295	SAG	0.00363	2	234.216	234.256	0.53	0.638
7356	SCGB1A1	0.0428	11	62.1726	62.1907	0.535	0.636
10648	SCGB1D1	0.0111	11	61.9577	61.961	0.531	0.654
6336	SCN10A	0.0187	3	38.7383	38.8355	0.523	0.657
11280	SCN11A	9.81e-05	3	38.8873	38.9921	0.502	0.635
55800	SCN3B	0.00597	11	123.5	123.526	0.538	0.627
6339	SCNN1D	0.00317	1	1.21582	1.22741	0.549	0.637
6340	SCNN1G	0.0437	16	23.194	23.2282	0.515	0.641
11341	SCRG1	0.0106	4	174.306	174.328	0.582	0.639
7448	SEBOX	0.00598	17	26.6943	26.7001	0.534	0.633
9717	SEC14L5	0.0197	16	5.00832	5.06916	0.521	0.645
56920	SEMA3G	0.0113	3	52.4671	52.4791	0.547	0.628
80031	SEMA6D	0.000155	15	47.4763	48.0664	0.542	0.643
8482	SEMA7A	0.00516	15	74.7016	74.7268	0.51	0.649
5267	SERPINA4	0.00174	14	95.0274	95.0362	0.54	0.645
5273	SERPINB10	0.0388	18	61.5644	61.6033	0.527	0.661
5345	SERPINF2	0.000521	17	1.64613	1.65856	0.528	0.631
5276	SERPINI2	0.00495	3	167.16	167.197	0.558	0.66
23544	SEZ6L	0.0103	22	26.5654	26.7796	0.514	0.634
6424	SFRP4	0.0258	7	37.9455	38.0653	0.529	0.641
10110	SGK2	0.0214	20	42.1876	42.2169	0.521	0.632
10044	SH2D3C	0.00063	9	130.501	130.541	0.531	0.647
6457	SH3GL3	0.00298	15	84.116	84.2875	0.526	0.645
79628	SH3TC2	0.000634	5	148.303	148.443	0.539	0.629
55423	SIRPG	0.0114	20	1.6098	1.63843	0.528	0.633
4990	SIX6	0.00305	14	60.9757	60.9796	0.553	0.666
6554	SLC10A1	0.0385	14	70.2421	70.264	0.52	0.656
6555	SLC10A2	0.000226	13	103.696	103.719	0.529	0.652
57468	SLC12A5	0.0257	20	44.6504	44.6888	0.536	0.654
6568	SLC17A1	0.000725	6	25.7831	25.8323	0.533	0.657
10786	SLC17A3	0.0113	6	25.8333	25.8825	0.559	0.657
10050	SLC17A4	0.00333	6	25.7549	25.7814	0.539	0.647
57084	SLC17A6	0.0178	11	22.3596	22.401	0.536	0.63
6570	SLC18A1	0.0301	8	20.0024	20.0407	0.54	0.64
80704	SLC19A3	0.000165	2	228.55	228.583	0.528	0.631
6506	SLC1A2	0.000326	11	35.2728	35.4416	0.525	0.636
6512	SLC1A7	0.00276	1	53.5529	53.6083	0.512	0.643
25769	SLC24A2	0.0108	9	19.5074	19.7869	0.535	0.651
65012	SLC26A10	0.00134	12	58.0133	58.0199	0.527	0.644
9154	SLC28A1	0.0274	15	85.4279	85.5189	0.518	0.667
9153	SLC28A2	0.0395	15	45.5444	45.5681	0.519	0.639
64078	SLC28A3	0.00758	9	86.8904	86.9557	0.503	0.633
10568	SLC34A2	0.0299	4	25.6569	25.6804	0.531	0.632
29986	SLC39A2	0.026	14	21.4674	21.47	0.538	0.631
8671	SLC4A4	0.00318	4	72.053	72.4378	0.531	0.638
6523	SLC5A1	0.00261	22	32.439	32.509	0.538	0.65
6529	SLC6A1	0.0151	3	11.0344	11.0809	0.552	0.645
6539	SLC6A12	0.00124	12	0.299243	0.323736	0.548	0.657
6540	SLC6A13	0.00525	12	0.329789	0.372039	0.516	0.633
28968	SLC6A16	0.00336	19	49.7929	49.8285	0.539	0.632
6532	SLC6A4	0.000122	17	28.5213	28.563	0.536	0.643
11136	SLC7A9	0.0218	19	33.3214	33.3607	0.517	0.64
6549	SLC9A2	0.00127	2	103.236	103.328	0.506	0.637
6579	SLCO1A2	0.00156	12	21.4175	21.5725	0.527	0.645
53919	SLCO1C1	0.00418	12	20.8483	20.9063	0.547	0.649
22865	SLITRK3	0.0319	3	164.905	164.915	0.547	0.655
6588	SLN	0.00244	11	107.578	107.59	0.55	0.645
79024	SMIM2	0.0306	13	44.7177	44.7354	0.508	0.636
6649	SOD3	0.00331	4	24.7915	24.8025	0.544	0.63
11166	SOX21	0.00375	13	95.3619	95.3644	0.542	0.639
653423	SPAG11A	0.0386	8	7.7054	7.72639	0.522	0.632
9576	SPAG6	0.00639	10	22.6344	22.7432	0.542	0.66
6677	SPAM1	0.0129	7	123.565	123.611	0.508	0.671
54466	SPIN2A	0.00534	X	57.161	57.1641	0.541	0.641
27290	SPINK4	0.0429	9	33.2184	33.2486	0.52	0.637
6708	SPTA1	0.000268	1	158.58	158.656	0.524	0.661
51332	SPTBN5	0.00152	15	42.1403	42.1863	0.502	0.628
10214	SSX3	0.00958	X	48.2058	48.2161	0.513	0.628
55576	STAB2	0.00814	12	103.981	104.161	0.502	0.637
81551	STMN4	0.00153	8	27.0928	27.1159	0.527	0.65
9515	STXBP5L	0.00888	3	120.627	121.144	0.537	0.679
27284	SULT1B1	0.0004	4	70.5869	70.6537	0.524	0.639
6820	SULT2B1	0.0135	19	49.0553	49.1027	0.513	0.635
25830	SULT4A1	0.00366	22	44.2204	44.2584	0.528	0.637
22987	SV2C	0.000305	5	75.379	75.6498	0.536	0.647
6847	SYCP1	0.00213	1	115.397	115.538	0.528	0.653
79953	SYNDIG1	0.00705	20	24.4498	24.6473	0.528	0.635
23546	SYNGR4	0.00806	19	48.8677	48.8796	0.527	0.631
6855	SYP	0.0224	X	49.0472	49.0597	0.531	0.636
57586	SYT13	0.00893	11	45.2619	45.3079	0.528	0.656
6861	SYT5	0.0134	19	55.6826	55.6918	0.51	0.637
9287	TAAR2	0.03	6	132.938	132.945	0.523	0.652
6870	TACR3	0.0219	4	104.507	104.641	0.535	0.638
29114	TAGLN3	0.00349	3	111.718	111.733	0.538	0.629
50834	TAS2R1	0.0104	5	9.62911	9.71249	0.538	0.647
50833	TAS2R16	0.0194	7	122.635	122.636	0.522	0.661
50832	TAS2R4	0.00123	7	141.478	141.479	0.531	0.665
50835	TAS2R9	0.00075	12	10.9617	10.9628	0.534	0.663
6911	TBX6	0.00977	16	30.0971	30.1032	0.501	0.645
6953	TCP10	0.00207	6	167.56	167.61	0.54	0.655
6954	TCP11	0.0125	6	35.0858	35.1164	0.534	0.669
6999	TDO2	0.000178	4	156.776	156.842	0.537	0.642
7007	TECTA	1.04e-05	11	120.972	121.062	0.524	0.635
56156	TEX13B	0.00947	X	107.224	107.226	0.542	0.636
56154	TEX15	0.00138	8	30.6891	30.7481	0.529	0.648
25858	TEX40	0.00994	11	64.0679	64.0722	0.533	0.642
7038	TG	0.00163	8	133.879	134.147	0.529	0.647
7053	TGM3	0.0273	20	2.27665	2.32172	0.542	0.649
10333	TLR6	0.00423	4	38.8253	38.8584	0.504	0.632
9032	TM4SF5	0.00181	17	4.67518	4.68651	0.53	0.64
79905	TMC7	0.00643	16	18.9953	19.0753	0.503	0.646
9911	TMCC2	0.00112	1	205.197	205.242	0.534	0.634
441151	TMEM151B	0.0262	6	44.2382	44.2752	0.503	0.639
59353	TMEM35	0.0161	X	100.334	100.351	0.542	0.646
55287	TMEM40	0.0237	3	12.775	12.811	0.506	0.638
9407	TMPRSS11D	0.0229	4	68.6866	68.7498	0.521	0.644
28983	TMPRSS11E	0.0348	4	69.3132	69.3633	0.532	0.64
5651	TMPRSS15	0.0064	21	19.6414	19.8582	0.514	0.651
80975	TMPRSS5	0.00371	11	113.558	113.577	0.541	0.639
7124	TNF	0.0202	6	31.5433	31.5461	0.501	0.636
63923	TNN	0.0458	1	175.037	175.117	0.532	0.625
7140	TNNT3	0.00343	11	1.94079	1.95994	0.521	0.644
7143	TNR	0.00895	1	175.284	175.713	0.51	1
27296	TP53TG5	0.00102	20	44.0025	44.0365	0.532	0.669
8626	TP63	0.00658	3	189.349	189.615	0.508	0.628
79097	TRIM48	4.68e-05	11	55.0297	55.0386	0.524	0.65
8989	TRPA1	0.000542	8	72.9322	72.9879	0.528	0.632
7222	TRPC3	0.000881	4	122.8	122.873	0.518	0.631
7225	TRPC6	0.0102	11	101.322	101.743	0.521	0.628
80036	TRPM3	0.0013	9	73.144	74.0618	0.505	0.645
56302	TRPV5	0.00538	7	142.605	142.631	0.501	0.636
7252	TSHB	0.000733	1	115.572	115.577	0.525	0.645
60385	TSKS	0.00336	19	50.243	50.2666	0.507	0.65
7274	TTPA	0.00352	8	63.9611	63.9986	0.533	0.672
79861	TUBAL3	0.00146	10	5.43506	5.44679	0.525	0.634
10382	TUBB4A	0.0386	19	6.49433	6.50286	0.567	0.645
7287	TULP1	0.0025	6	35.4657	35.4807	0.532	0.639
7288	TULP2	0.00257	19	49.3842	49.402	0.553	0.655
7299	TYR	1.71e-05	11	88.9106	89.0289	0.558	0.631
7306	TYRP1	0.00326	9	12.6854	12.7103	0.591	0.638
50613	UBQLN3	0.00128	11	5.52853	5.53122	0.531	0.656
11045	UPK1A	0.0433	19	36.1577	36.1694	0.541	0.656
7348	UPK1B	0.00625	3	118.892	118.924	0.525	0.642
7379	UPK2	0.0411	11	118.796	118.829	0.511	0.645
10083	USH1C	0.00578	11	17.5154	17.566	0.526	0.633
57663	USP29	0.0136	19	57.6305	57.6433	0.537	0.645
7404	UTY	0.00328	Y	15.3603	15.5926	0.512	0.634
7425	VGF	0.000379	7	100.806	100.809	0.531	0.632
57191	VN1R1	0.0211	19	57.9665	57.9679	0.519	0.642
8838	WISP3	0.00235	6	112.375	112.392	0.529	0.628
7471	WNT1	0.0243	12	49.3724	49.3755	0.536	0.644
7704	ZBTB16	0.0129	11	113.93	114.121	0.55	0.646
23217	ZFR2	0.0113	19	3.80402	3.86903	0.54	0.649
7544	ZFY	0.000979	Y	2.80311	2.85055	0.537	0.639
7745	ZKSCAN8	0.00849	6	28.1097	28.1273	0.505	0.643
51364	ZMYND10	0.00903	3	50.3785	50.3843	0.515	0.63
7691	ZNF132	0.000358	19	58.9442	58.9516	0.532	0.636
129025	ZNF280A	0.00302	22	22.8681	22.8746	0.541	0.668
57336	ZNF287	0.00603	17	16.4547	16.4725	0.506	0.628
9745	ZNF536	0.0309	19	30.7192	31.2044	0.558	0.662
9726	ZNF646	1.07e-05	16	31.0857	31.0955	0.528	0.632
100131827	ZNF717	0.0056	3	75.7588	75.8347	0.536	0.661
148066	ZNRF4	0.0123	19	5.45543	5.45687	0.539	0.648
11055	ZPBP	0.0143	7	49.89	50.1609	0.529	0.638
